# Supplementary material for: β-Phenylalanine Ester Synthesis from Stable β-Keto Ester Substrate Using Engineered ω-Transaminases
Source: MDPI journal article supplement (doi:10.3390/molecules23051211), 2018-05-18
Supplement: s1 [file s1]

## Supplementary material

### **$\beta$ -phenylalanine ester synthesis from stable $\beta$ -keto ester substrate using engineered $\omega$ -transaminases**

Oliver Bu $\beta$ <sup>1</sup>, Moritz Vo $\beta$ <sup>2</sup>, Andr e Delavault<sup>1</sup>, Pascal Gorenflo<sup>1</sup>, Christoph Syldatk<sup>1</sup>, Uwe Bornscheuer<sup>2</sup> and Jens Rudat<sup>1</sup>

<sup>1</sup>Institute of Process Engineering in Life Sciences, Section II: Technical Biology, Karlsruhe Institute of Technology, Karlsruhe, Germany

<sup>2</sup>Dept. of Biotechnology & Enzyme Catalysis, University of Greifswald, Institute of Biochemistry, Felix-Hausdorff-Str. 4, 17487 Greifswald, Germany

Corresponding author: [oliver.buss@kit.edu](mailto:oliver.buss@kit.edu)

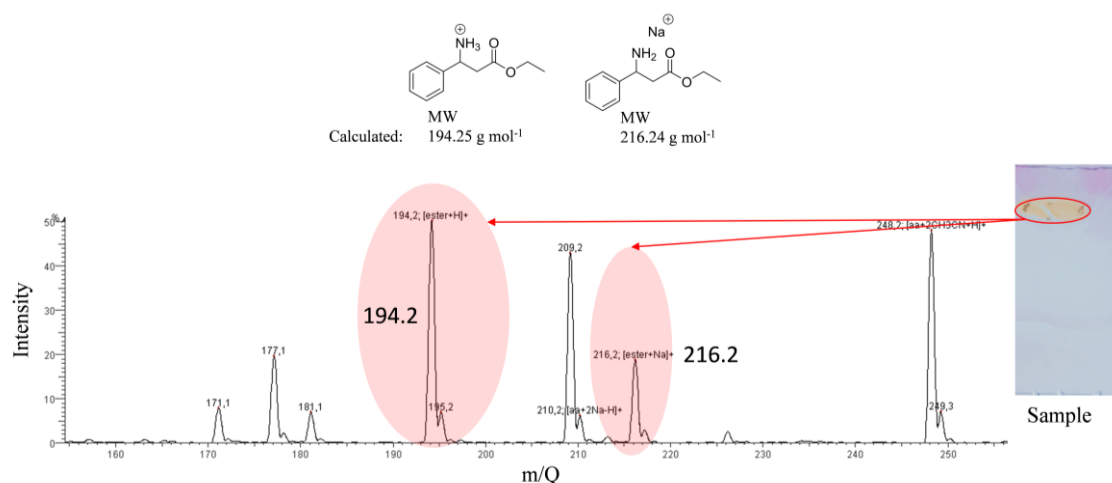

**Figure S1** TLC-MS analysis of **2**. **2** was synthesized using the transaminase 3FCR\_4M. The resulting MS signals 194.2 (plus proton) and 216.2 (plus sodium) were identified as expected molecular weight (MW) signals for **2**. TLC-MS measurements were verified using methyl-3-amino-phenylpropanoate as standard.

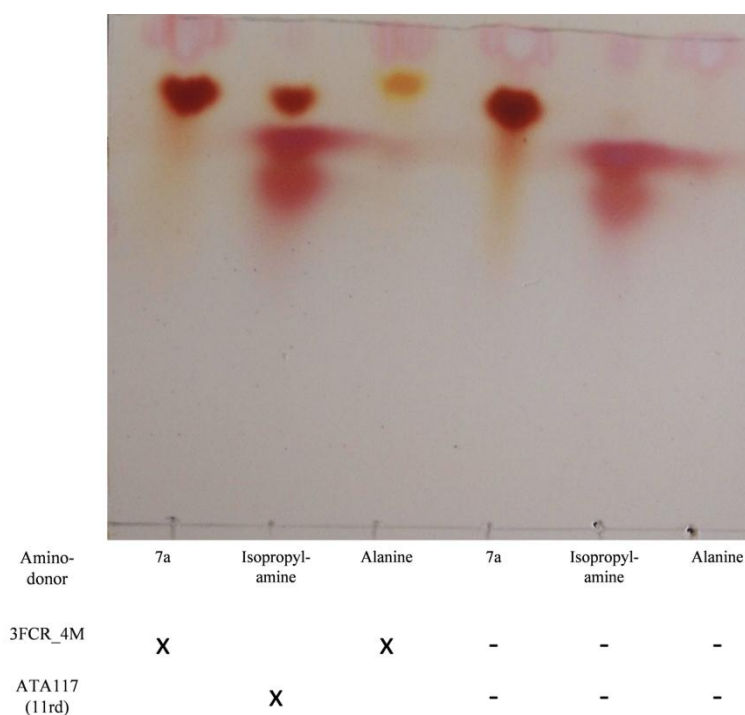

**Figure S2** Pre-test of different amino donors **7a**, isopropylamine and alanine with **3** as amino acceptor. Reaction was performed at 30 °C in 50 mM HEPES buffer pH 7.5. 3FCR\_4M as well as ATA117 11Rd were tested (- without enzyme). Concentration of the different amino donors: **7a** 50 mM, isopropylamine 400 mM and alanine 250 mM. The concentration of the substrate **3** was 10 mM. In yellow-orange the product **2** and in red-orange **7a** spots can be seen. The samples were taken after 24 h. ATA117 11Rd forms the unexpected product **7a** with isopropylamine as amino donor.

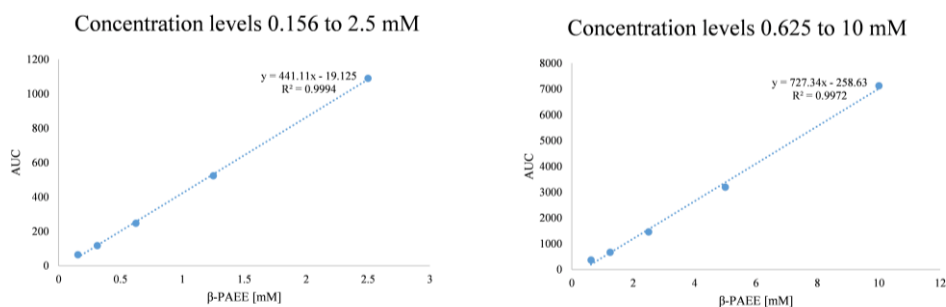

**Figure S3** Gas chromatography analysis for the detection of  $\beta$ -phenylalanine ethyl ester. Solutions of different concentrations were prepared in buffer (pH 7.5) and extraction was performed using EtOAc. The extracted **2** in the organic phase (EtOAc) was analyzed using GC. The resulting peak area (AUC) at 28.9 min, detected by FID, was utilized for linear calibration.

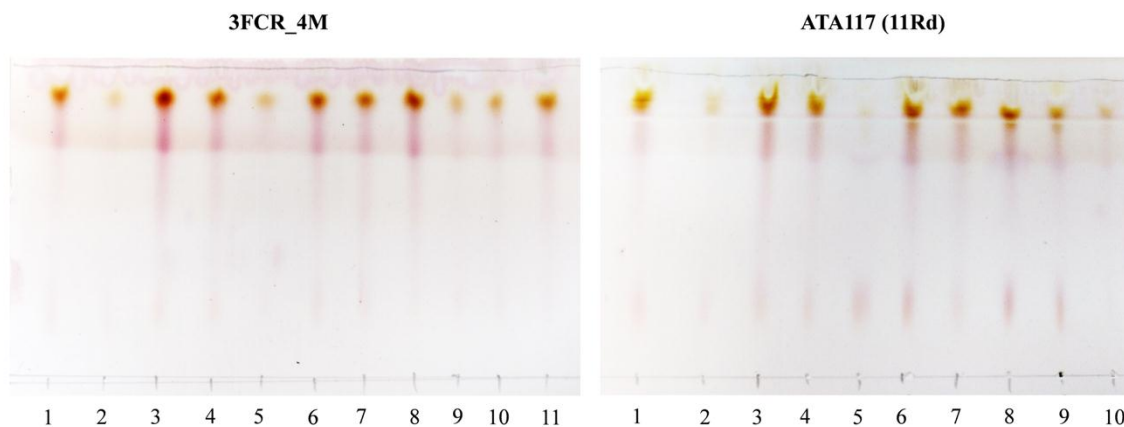

**Figure S4** Design of Experiments varying DMSO, *o*-xylylenediamine and  $\beta$ -keto ester concentrations. The experiments were performed at 30 °C in 200  $\mu$ L scale. The brown-yellow spot indicates the formation of **2**. The results were confirmed using GC. The concentrations of the mixture ingredients are reported in Table S2 and S3.

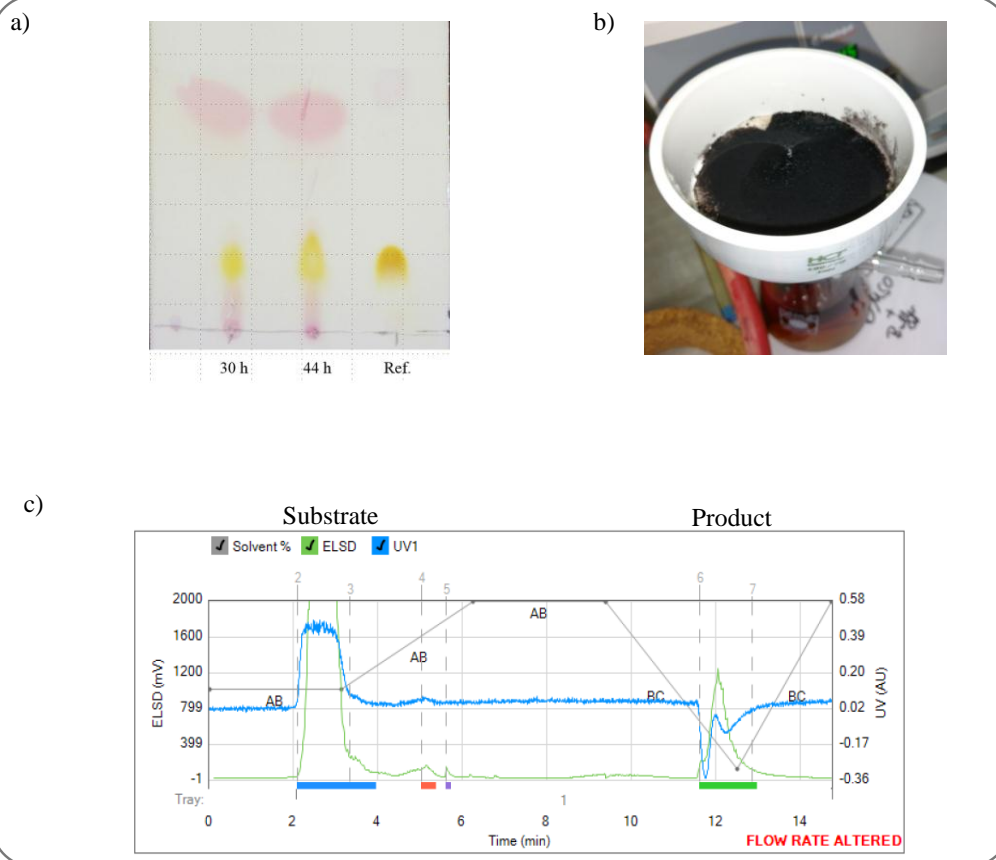

**Figure S5** Reaction batch on a 200 mL scale after 48 h of reaction time using 3FCR\_4M. a) Samples were taken during the whole reaction time (yellow spot indicates product). b) A strong discoloration was observed. c) Chromatogram of the flash chromatography purification using solvent gradient. Product was detected by ELSD signal

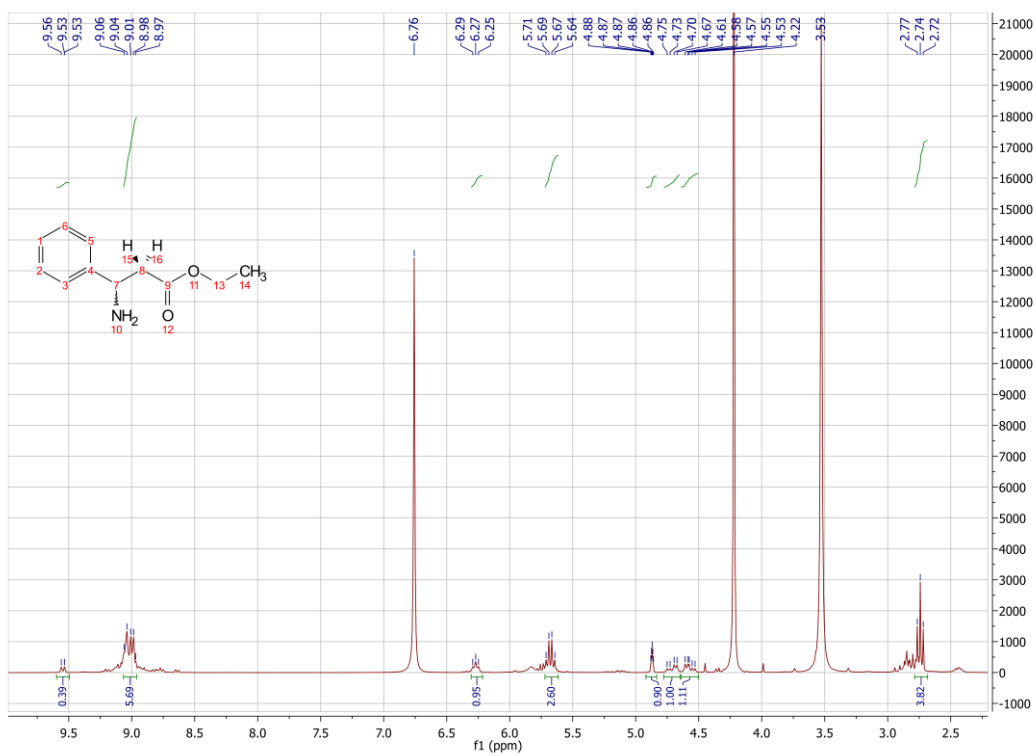

**Figure S6**  $^1\text{H}$ -NMR-spectrum of the product after purification using flash chromatography.

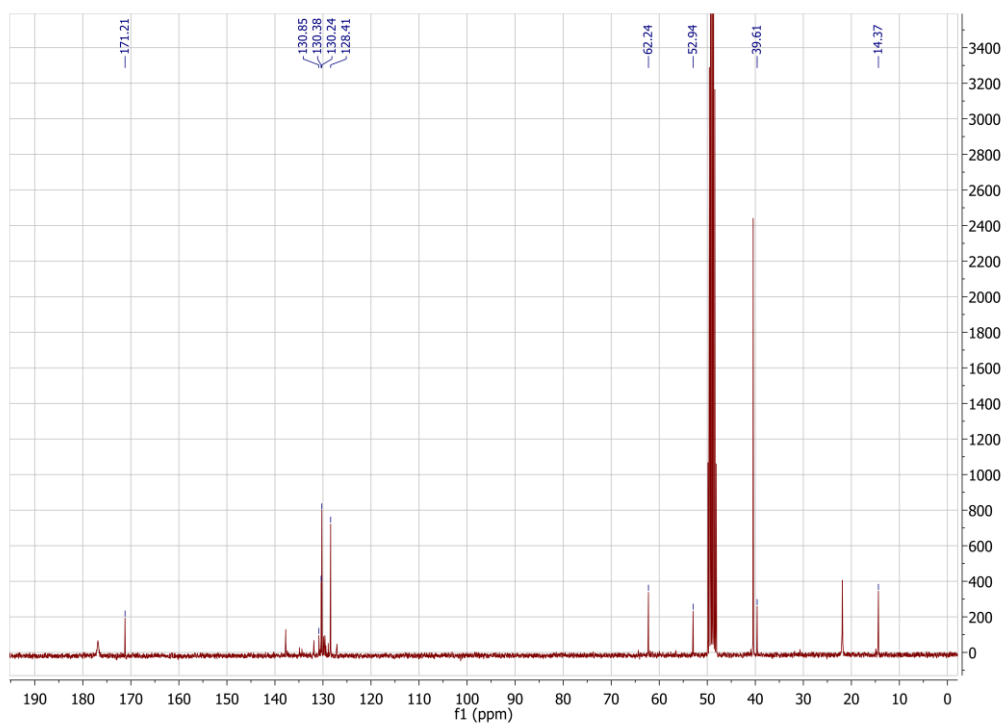

**Figure S7**  $^{13}\text{C}$ -NMR-spectrum of the product after purification using flash chromatography

**Table S1**  $\omega$ -TA plasmids and host organism of the transaminases for the  $\beta$ -phenylalanine ethyl ester screening. Expressions of the different  $\omega$ -TA variants were performed in 96-deepwell plates using the expression host *E. coli* BL21 (DE3) and the indicated antibiotics and inducers.

| <u>Source</u>                        | <u>Abbr.</u> | <u>Vector</u> | <u>Resistance</u> | <u>Inducer</u> | <u>Fold type*</u> |
|--------------------------------------|--------------|---------------|-------------------|----------------|-------------------|
| <i>Ruegeria pomeroyi</i>             | 3HMU         | pET22b        | Amp               | IPTG           | I                 |
| <i>Ruegeria</i> sp. TM1040           | 3FCR         | pET22b        | Amp               | IPTG           | I                 |
| <i>Mesorhizobium loti</i>            | 3GJU         | pET22b        | Amp               | IPTG           | I                 |
| <i>Rhodobacter sphaeroides</i> KD131 | 3I5T         | pET22b        | Amp               | IPTG           | I                 |
| <i>Vibrio fluvialis</i>              | VibFlu       | pET24b        | Kan               | IPTG           | I                 |
| <i>Mesorhizobium</i> sp. LUK         | 2YKY         | pET28b        | Kan               | IPTG           | I                 |
| <i>Chromobacterium violaceum</i>     | Cvi          | pET28a        | Kan               | IPTG           | I                 |
| <i>Aspergillus oryzae</i>            | AspOry       | pGASTON       | Amp               | Rhamnose       | IV                |
| <i>Aspergillus terreus</i>           | AspTer       | pGASTON       | Amp               | Rhamnose       | IV                |
| <i>Mycobacterium vanbaalenii</i>     | MycVan       | pGASTON       | Amp               | Rhamnose       | IV                |
| <i>Penicillium chrysogenum</i>       | PenChr       | pGASTON       | Amp               | Rhamnose       | IV                |
| <i>Burkholderia</i> sp.              | BurSp        | pGASTON       | Amp               | Rhamnose       | IV                |
| <i>Rhizobium etli</i>                | RhiEtl       | pGASTON       | Amp               | Rhamnose       | IV                |
| <i>Hyphomonas neptunium</i>          | HypNep       | pGASTON       | Amp               | Rhamnose       | IV                |
| <i>Gamma proteobacterium</i>         | GamPro       | pGASTON       | Amp               | Rhamnose       | IV                |
| <i>Labrenzia alexandrii</i>          | LabAle       | pGASTON       | Amp               | Rhamnose       | IV                |
| <i>Marimonas</i> sp.                 | MarSp        | pGASTON       | Amp               | Rhamnose       | IV                |
| <i>Nocardia farcinica</i>            | NocFar       | pGASTON       | Amp               | Rhamnose       | IV                |
| <i>Rhodoferax ferrireducens</i>      | RhoFer       | pGASTON       | Amp               | Rhamnose       | IV                |

|                                         |             |         |     |          |    |
|-----------------------------------------|-------------|---------|-----|----------|----|
| <i>Bacillus</i> sp.                     | D-AlaTA     | pGASTON | Amp | Rhamnose | IV |
| <i>Aspergillus fumigatus</i>            | AspFum      | pET22b  | Amp | IPTG     | IV |
| <i>Gibberella zeae</i>                  | GibZea      | pET22b  | Amp | IPTG     | IV |
| <i>Neosartorya fischeri</i>             | NeoFis      | pET22b  | Amp | IPTG     | IV |
| <i>Rhodobacter sphaeroides</i>          | RhoSph      | pET22b  | Amp | IPTG     | IV |
| <i>Jannaschia</i> sp.                   | JanSp       | pET22b  | Amp | IPTG     | IV |
| <i>Mesorhizobium loti</i>               | MesLoti     | pET22b  | Amp | IPTG     | IV |
| <i>Roseobacter</i> sp.                  | RosSp       | pET22b  | Amp | IPTG     | IV |
| <i>Arthrobacter</i> sp.<br>KNK168       | ATA117      | pET22b  | Amp | IPTG     | IV |
| <i>Arthrobacter</i> sp.<br>KNK168 (mut) | ATA117 11rd | pET22b  | Amp | IPTG     | IV |

\* Fold type of PLP-dependent enzymes (for ω-TA relevant only I and IV)



**Table S2** Design of Experiments for the optimization of  $\beta$ -phenylalanine ethyl ester production using 3FCR\_4M. The concentrations of *o*-xylylenediamine (**4**),  $\beta$ -keto ester (**3**) and DMSO were varied. The reactions were conducted at 30 °C for 24 h. The concentration of  $\beta$ -phenylalanine ethyl ester was determined using GC.

| <b>RUN</b> | <b>4 [mM]</b> | <b>3 [mM]</b> | <b>DMSO [%v/v]</b> | <b>Conversion</b> |
|------------|---------------|---------------|--------------------|-------------------|
| <b>1</b>   | 100           | 40            | 10                 | 6%                |
| <b>2</b>   | 10            | 40            | 10                 | 6%                |
| <b>3</b>   | 100           | 40            | 30                 | 6%                |
| <b>4</b>   | 55            | 25            | 20                 | 11%               |
| <b>5</b>   | 10            | 10            | 10                 | 27%               |
| <b>6</b>   | 55            | 25            | 20                 | 11%               |
| <b>7</b>   | 100           | 10            | 10                 | 23%               |
| <b>8</b>   | 100           | 10            | 30                 | 15%               |
| <b>9</b>   | 10            | 40            | 30                 | 5%                |
| <b>10</b>  | 10            | 10            | 30                 | 18%               |
| <b>11</b>  | 55            | 25            | 20                 | 12%               |

**Table S3** Design of Experiments for the optimization of  $\beta$ -phenylalanine ethyl ester production using ATA117 11Rd. The concentrations of *o*-xylylenediamine (**4**),  $\beta$ -keto ester (**3**) and DMSO were varied. The reactions were conducted at 30 °C for 24 h. The concentration of  $\beta$ -phenylalanine ethyl ester was determined using GC.

| <b>RUN</b> | <b>4 [mM]</b> | <b>3 [mM]</b> | <b>DMSO [%v/v]</b> | <b>Conversion</b> |
|------------|---------------|---------------|--------------------|-------------------|
| <b>1</b>   | 100           | 40            | 10                 | 1.6%              |
| <b>2</b>   | 10            | 40            | 10                 | 1.5%              |
| <b>3</b>   | 100           | 40            | 30                 | 1.8%              |
| <b>4</b>   | 55            | 25            | 20                 | 3.2%              |
| <b>5</b>   | 10            | 10            | 10                 | 6.5%              |
| <b>6</b>   | 55            | 25            | 20                 | 3%                |
| <b>7</b>   | 100           | 10            | 10                 | 6.8%              |
| <b>8</b>   | 100           | 10            | 30                 | 5.5%              |
| <b>9</b>   | 10            | 40            | 30                 | 1.4%              |
| <b>10</b>  | 10            | 10            | 30                 | 3.1%              |
| <b>11</b>  | 55            | 25            | 20                 | 2.5%              |
